# Supplementary material for: TNF Blockade Maintains an IL-10+ Phenotype in Human Effector CD4+ and CD8+ T Cells
Source: PubMed Central journal article supplement (PMC5309392; doi:10.3389/fimmu.2017.00157), 2017-02-15
Supplement: presentation_1.pdf [file presentation_1.pdf]

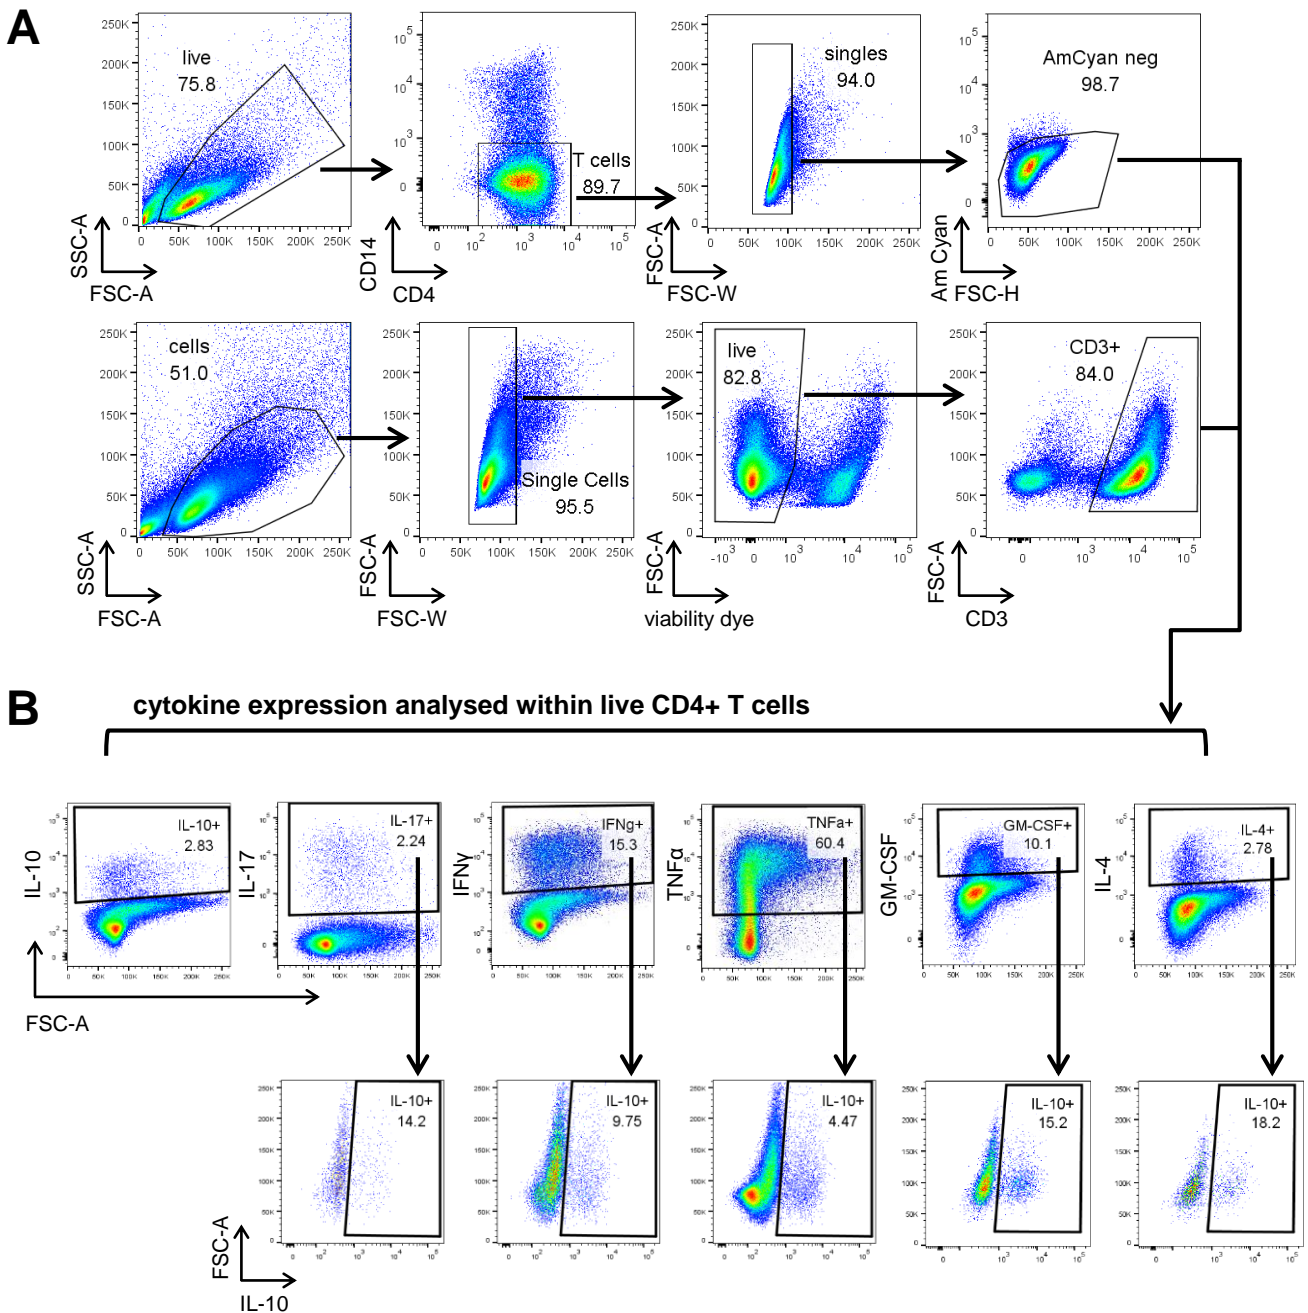

**Supplementary Figure 1. Gating strategy for analysis of cytokine expressing cells following CD4+ T cell/CD14+ monocyte co-cultures. (A)** A live gate was set around viable lymphocytes based on forward scatter/side scatter (FSC/SSC). Within CD14- CD4+ cells, doublets were excluded. In some experiments AmCyan negative events were gated to reduce interference from cellular autofluorescence (upper row), or where a fixable viability dye was included, this was plotted against FSC and used to exclude any remaining dead cells, and CD3 was stained intracellularly to identify T cells (lower row). **(B)** Within live CD4+ T cells each cytokine was plotted individually against FSC and gates were placed using a sample stained without anti-cytokine antibody. IL-10+ cells were then analyzed as a proportion of total CD4+ T cells or within the IL-17+, IFN $\gamma$ +, TNF $\alpha$ +, GM-CSF+ or IL-4+ CD4+ T cell subsets, as indicated.

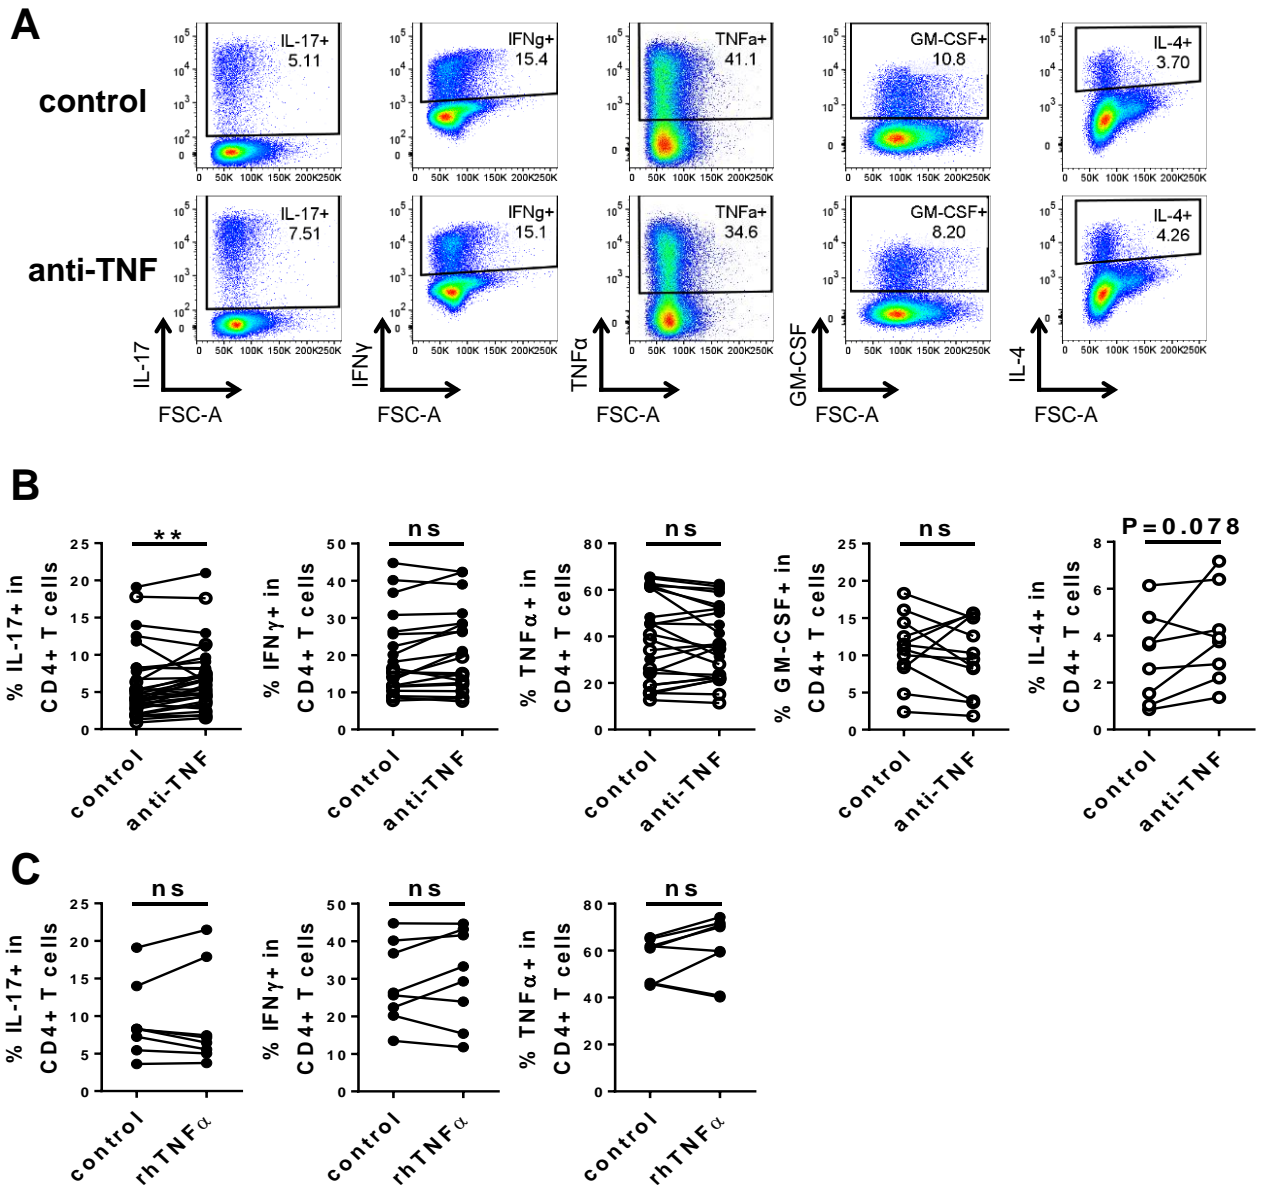

**Supplementary Figure 2. Effects of TNF blockade and hrTNF $\alpha$  addition on total IL-17+, IFN $\gamma$ +, TNF $\alpha$ +, GM-CSF+ or IL-4+ CD4+ T cell populations.** CD4+ T cells (open symbols) or CD4+CD45RO+ T cells (black symbols) were co-cultured with CD14+ monocytes and anti-CD3 mAb in the absence or presence of adalimumab (1  $\mu$ g/ml) (**A**, **B**) or in the presence of hrTNF $\alpha$  (10 ng/ml) (**C**) for three days as described in the methods. CD4+ T cells were gated as described in Supplementary Figure 1. (**A**, **B**) Representative dot plots (**A**) and cumulative data (**B**) showing the percentages of IL-17+ ( $n = 35$ ), IFN $\gamma$ + ( $n = 21$ ), TNF $\alpha$ + ( $n = 24$ ), GM-CSF+ ( $n = 12$ ) or IL-4+ ( $n = 8$ ) cells within CD4+ T cells in the absence or presence of anti-TNF. (**C**) Cumulative data showing the percentages of IL-17+ ( $n = 8$ ), IFN $\gamma$ + ( $n = 8$ ) or TNF $\alpha$ + ( $n = 8$ ) cells within CD4+CD45RO+ T cells in the absence or presence of hrTNF $\alpha$ . Data were analyzed using Wilcoxon matched-pairs signed rank test. Each connecting line represents an individual donor. ns  $p > 0.05$ , \*\*  $p < 0.01$ .

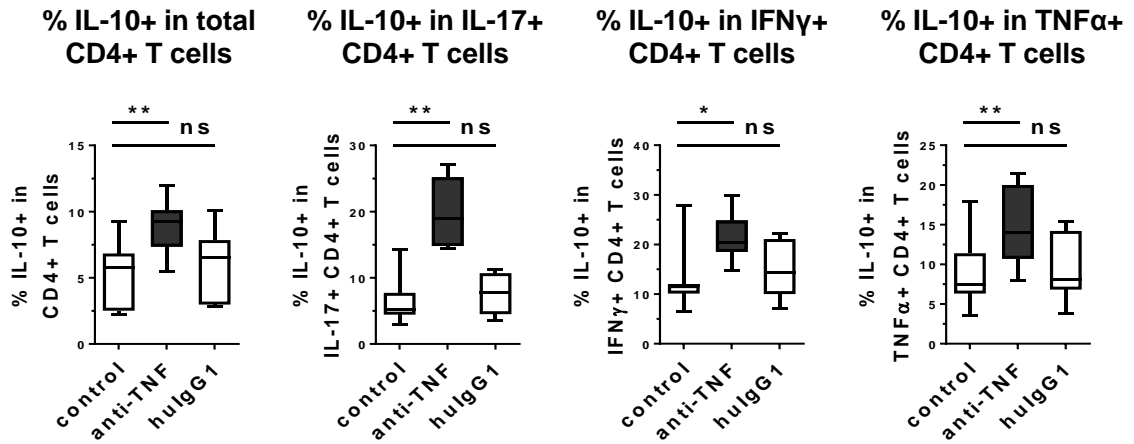

**Supplementary Figure 3. Isotype control human IgG mAb does not promote IL-10 expression in CD4+ T cells.** CD4+ T cells ( $n = 3$ ) or CD4+CD45RO+ T cells ( $n = 4$ ) were co-cultured with CD14+ monocytes and anti-CD3 mAb in the absence or presence of adalimumab (1  $\mu\text{g/ml}$ ) or human IgG mAb (1  $\mu\text{g/ml}$ ) for three days as described in the methods. CD4+ T cells were gated as described in Supplementary Figure 1 and the percentage of IL-10+ cells within total CD4+, or within IL-17+, IFN $\gamma$ + or TNF $\alpha$ + CD4+ T cells was assessed by flow cytometry. Box-whisker plots show data from  $n = 7$  individual donors; whiskers show minimum and maximum values. Data were analyzed using Friedman test with Dunn's Multiple Comparisons test. ns  $p > 0.05$ , \*  $p < 0.05$ , \*\*  $p < 0.01$ .

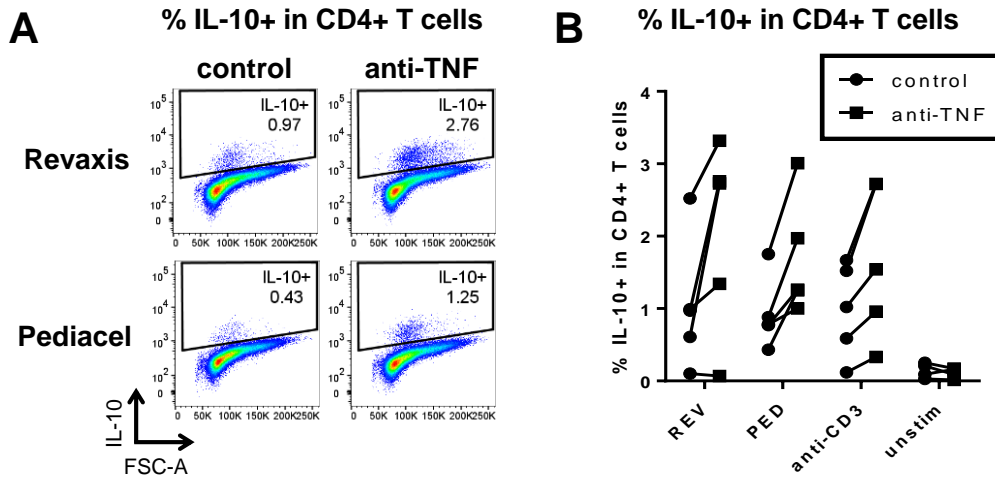

**Supplementary Figure 4. TNF blockade promotes IL-10 in CD4+ T cells stimulated in an antigen-specific manner.** CD4+ T cells ( $5 \times 10^5$ ) were co-cultured with autologous CD14+ monocytes ( $5 \times 10^4$ ) and stimulated with anti-CD3 mAb (100 ng/ml), Revaxis (REV) or Pediaxel (PED) vaccine (both used at 1:1000 dilution) or left unstimulated (unstim), in the absence (control) or presence of anti-TNF mAb (adalimumab, 1  $\mu$ g/ml). After 6 days cells were re-stimulated with PMA/ionomycin and assessed for intracellular cytokine expression as described in the methods. **(A)** Representative dot plots and **(B)** cumulative data ( $n = 5$  except unstim,  $n = 4$ ) showing the frequencies of IL-10+ cells within total CD4+ T cells in the absence or presence of anti-TNF. Each connecting line represents an individual donor.

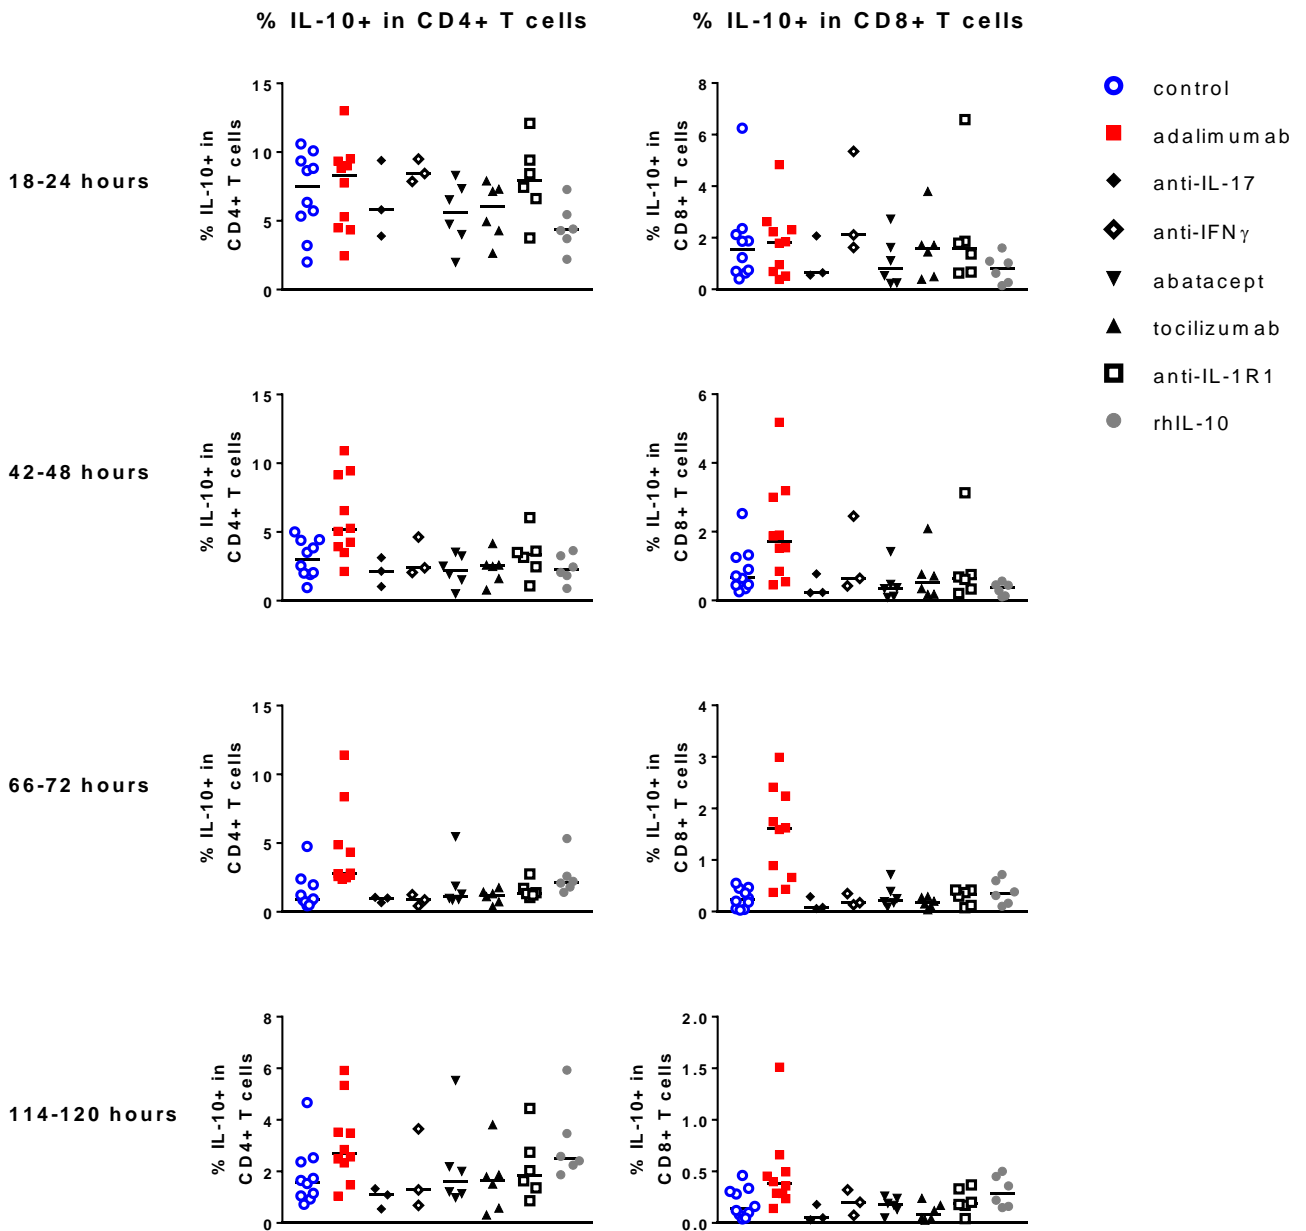

**Supplementary Figure 5. Kinetics of IL-10 regulation in CD4+ and CD8+ T cells in response to blockade of various pathways or exogenous recombinant human IL-10.**

PBMC were cultured in the presence of anti-CD3 mAb alone (control, 100 ng/ml,  $n = 10$ ), or with anti-TNF (adalimumab, 1  $\mu$ g/ml,  $n = 10$ ), neutralizing antibodies to IFN $\gamma$  or IL-17 (10  $\mu$ g/ml, both  $n = 3$ ), tocilizumab (50  $\mu$ g/ml,  $n=6$ ), abatacept (5  $\mu$ g/ml,  $n = 6$ ), anti-IL-1R1 blocking Ab (2  $\mu$ g/ml,  $n = 6$ ) or recombinant human IL-10 (10 ng/ml,  $n = 6$ ). At various time points (18-120 hours) cells were re-stimulated and assessed for intracellular cytokine expression as described in the methods. Scatter plots represent data showing the effect of TNF blockade on IL-10+ frequencies in CD4+ and CD8+ T cells over time; bars indicate median values.

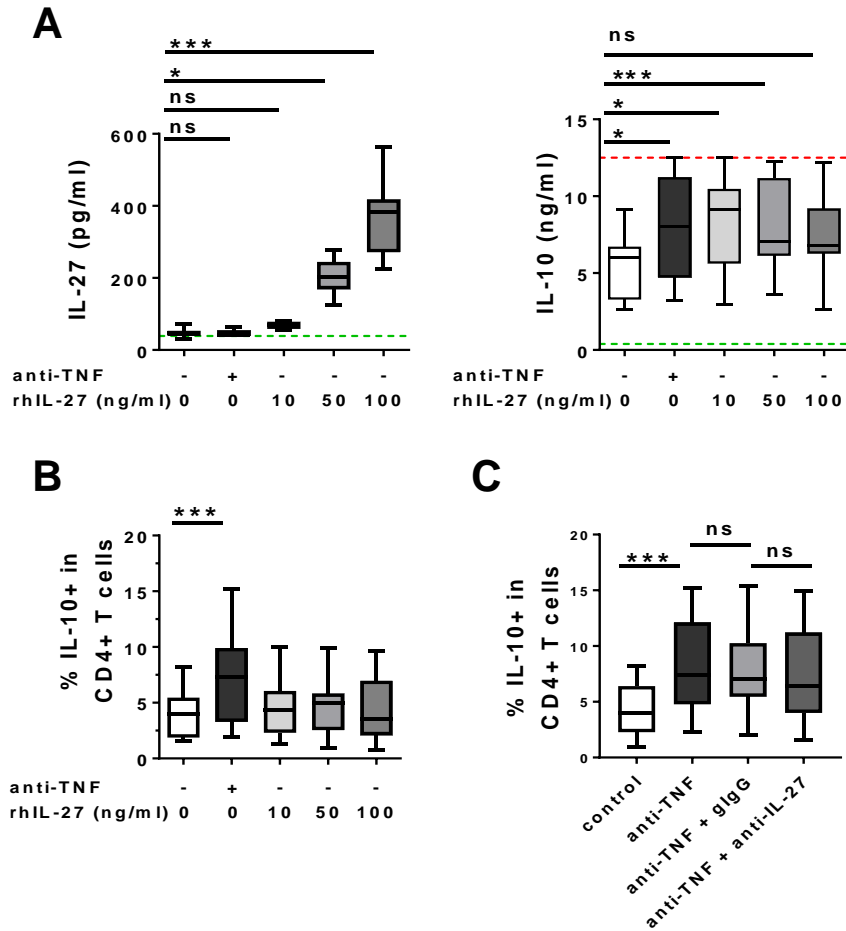

**Supplementary Figure 6. The monocyte-derived anti-inflammatory mediator IL-27 does not contribute to IL-10 regulation by TNF blockade. (A, B)** CD4<sup>+</sup> T cells were stimulated with immobilised anti-CD3 (1.25  $\mu$ g/ml) and soluble anti-CD28 (1  $\mu$ g/ml), with or without anti-TNF mAb (adalimumab, 1  $\mu$ g/ml) or IL-27 (10-100 ng/ml). **(A)** After three days IL-27 and IL-10 levels in culture supernatants were measured by ELISA ( $n = 7$ ), before cells were re-stimulated. **(B)** After three days, cells were assessed for intracellular cytokine expression as described in the methods. Box-whisker plots represent data from  $n = 8$  individual donors and show frequencies of IL-10<sup>+</sup> cells within the total CD4<sup>+</sup> T cell population; whiskers show minimum to maximum values. **(A, B)** Data were assessed by Friedman test with comparison to control by Dunn's multiple comparison test. **(C)** Bulk CD4<sup>+</sup> T cells ( $n = 7$ ) or CD45RO<sup>+</sup> enriched CD4<sup>+</sup> T cells ( $n = 3$ ) were stimulated with immobilised anti-CD3 (1.25  $\mu$ g/ml) and soluble CD28 (1  $\mu$ g/ml), or were co-cultured with monocytes and soluble anti-CD3 (100 ng/ml), in the absence (control) or presence of anti-TNF (adalimumab, 1  $\mu$ g/ml), with or without neutralising anti-IL-27 or goat IgG isotype control (IlgG; both 5  $\mu$ g/ml). After 3 days cells were assessed for intracellular cytokine expression as described in the methods. Data were analyzed by repeated measures ANOVA followed by Sidak's multiple comparison test. ns  $p > 0.05$ , \*  $p < 0.05$ , \*\*  $p < 0.01$ , \*\*\*  $p < 0.001$ .
